# Supplementary material
Source: Springer Nature journal article supplement (https://www.springermedizin.de/resource/supplementary/12991_2010_1031_MOESM1_ESM.pdf/9615614)

### Serum glutamine

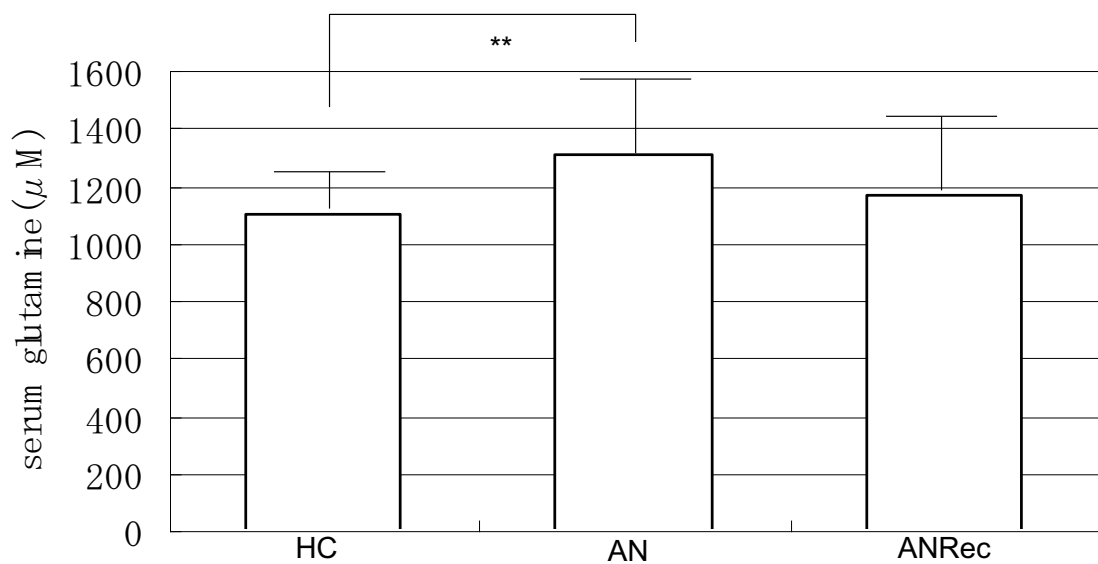

### Serum glutamate

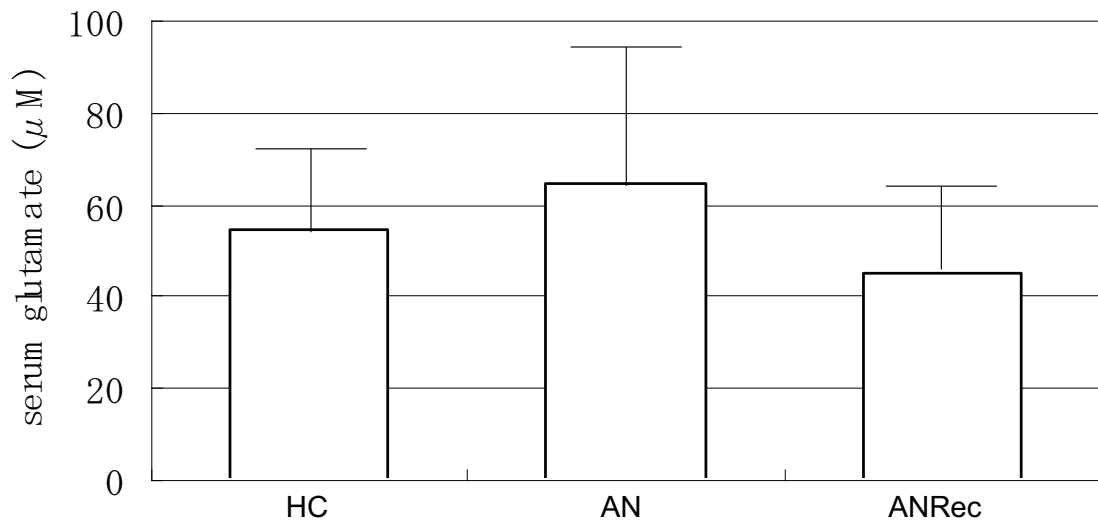

Supplement: MOESM1 [file 9615614]
